# Supplementary material for: Optimization and kinetics of crown ether-based hydroxyl-rich organic polymers for sustainable CO2 fixation and iodine vapor adsorption
Source: Royal Society of Chemistry journal article supplement (doi:10.1039/d3se01298k), 2023-12-05
Supplement: d3se01298k1.pdf [file d3se01298k1.pdf]

## Supporting Information

### Optimization and kinetics of crown ether-based hydroxyl-rich organic polymers for sustainable CO<sub>2</sub> fixation and iodine vapor adsorption

Ningning Li<sup>1</sup>, Yuhang Zhang<sup>1</sup>, Xuanbo Liu<sup>1</sup>, Xionglei Wang<sup>1</sup>, Yongjing Hao<sup>1,2</sup>,  
Tao Chang<sup>1,2,\*</sup>, Zheng Zhu<sup>1,\*</sup>, Balaji Panchal<sup>1</sup>, Shenjun Qin<sup>1,\*</sup>

### Experimental

#### Materials and reagents

Dibenzo-18-crown-6, hexamethylenetetramine, trifluoroacetic acid, dichloromethane, KI, HCl (1 mol·L<sup>-1</sup>), Sodium sulfate, iodine, 1,4-Dioxane, HOAc, hydroquinone, m-benzenetriol, bisphenol A and iodine were purchased from Aladdin Chemical Reagents Co. Ltd. All epoxides contained epichlorohydrin, epibromohydrin, allyl glycidyl ether, phenyl glycidyl ether, butyl glycidyl ether, epoxy hexane and styrene oxide were purchased from Energy Chemical Reagents Co. Ltd. All chemicals were analytical grade and were unpurified. CO<sub>2</sub> at 99.9% purity was supplied by Handan Anke Factory.

#### Characterization method of material

The FT-IR spectra were measured on a Nicolet IS10 spectrometer (400–4000 cm<sup>-1</sup>). <sup>1</sup>H NMR spectra were taken on a Bruker 400 spectrometer, and the deuterated chloroform (CDCl<sub>3</sub>) with tetramethylsilane (TMS) was used for the internal standard. The <sup>13</sup>C CP MAS NMR spectrum was acquired on a JNM-ECZ600R spectrometer, the <sup>13</sup>C chemical shift was related to HMB (hexamethylbenzene). The XPS spectrums were recorded by Thermo Fisher Scientific K-Alpha spectrometer using Al K Alpha source, the pass energy is 150.0 eV and corrected using C1s peak at 284.8 eV. SEM was performed

using a Hitachi SU-8020 microscope with an acceleration voltage of 3.0 kV. Nitrogen adsorption isotherm was achieved from a Micromeritics ASAP 2460 at 77 K, and the sample was degassed at 100°C for 6 h prior to adsorption measurement. Thermogravimetric (TG) curves were gained from STA499. CO<sub>2</sub> adsorption capacity was obtained from a Mike TriStar II Plus 3030 at 273 K, and the polymer was degassed at 120°C for 6 h. The profile of CO<sub>2</sub>-TPD was recorded for samples raised from 25°C to 250°C at a rate of 5°C/min and then held at 250°C for 1 h, also using a TriStar II Plus 3030.

**Table S1** BET surface area and pore volume of **CHOP@KI-1**

| catalysts | Surface area (m <sup>2</sup> /g) | Pore volume (cm <sup>3</sup> /g) | Pore diameter (nm) |
|-----------|----------------------------------|----------------------------------|--------------------|
| CHOP@KI-1 | 5.1601                           | 0.011377                         | 9.4297             |

**Table S2** I<sup>-</sup> concentration of **CHOP@KIs**

| Entry | Catalysts | I <sup>-</sup> concentration (mmol/g) <sup>a</sup> |
|-------|-----------|----------------------------------------------------|
| 1     | CHOP@KI-1 | 1.0532                                             |
| 2     | CHOP@KI-2 | 0.7941                                             |
| 3     | CHOP@KI-3 | 1.3876                                             |

<sup>a</sup> checked by ICP-OES.

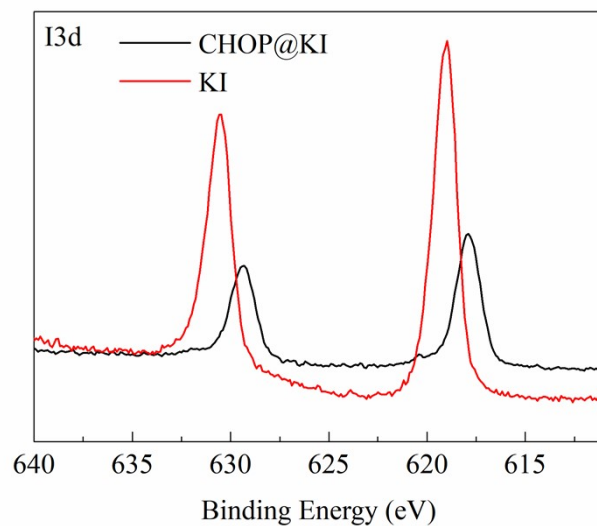

**Fig. S1** Interaction of CHOP with KI identified by XPS

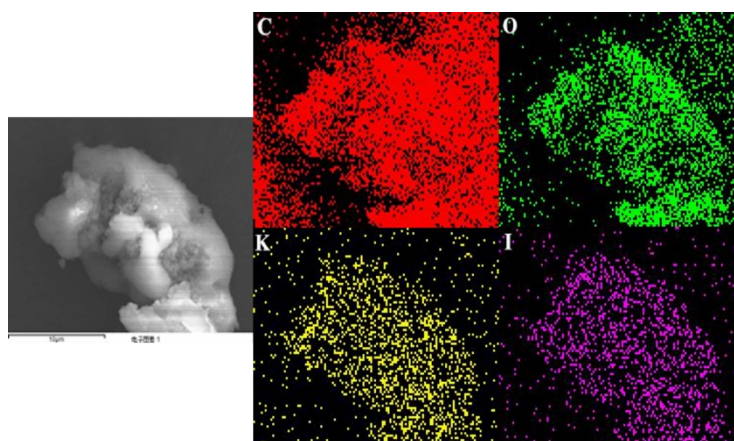

**Fig. S2** The C, O, I and K elemental map images of CHOP@KI-1.

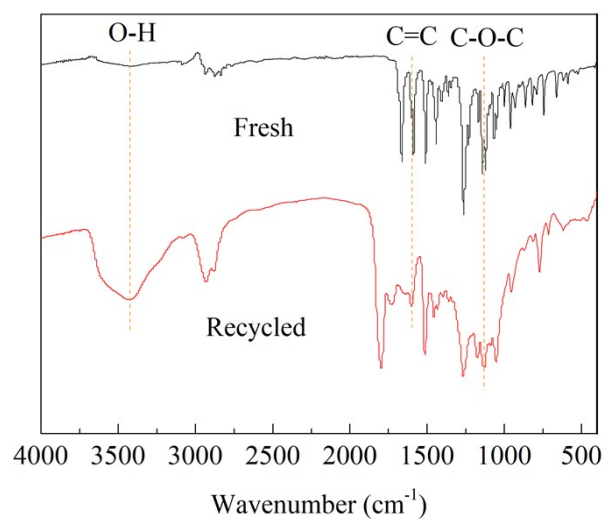

**Fig. S3** FT-IR spectra of fresh and recycled catalyst

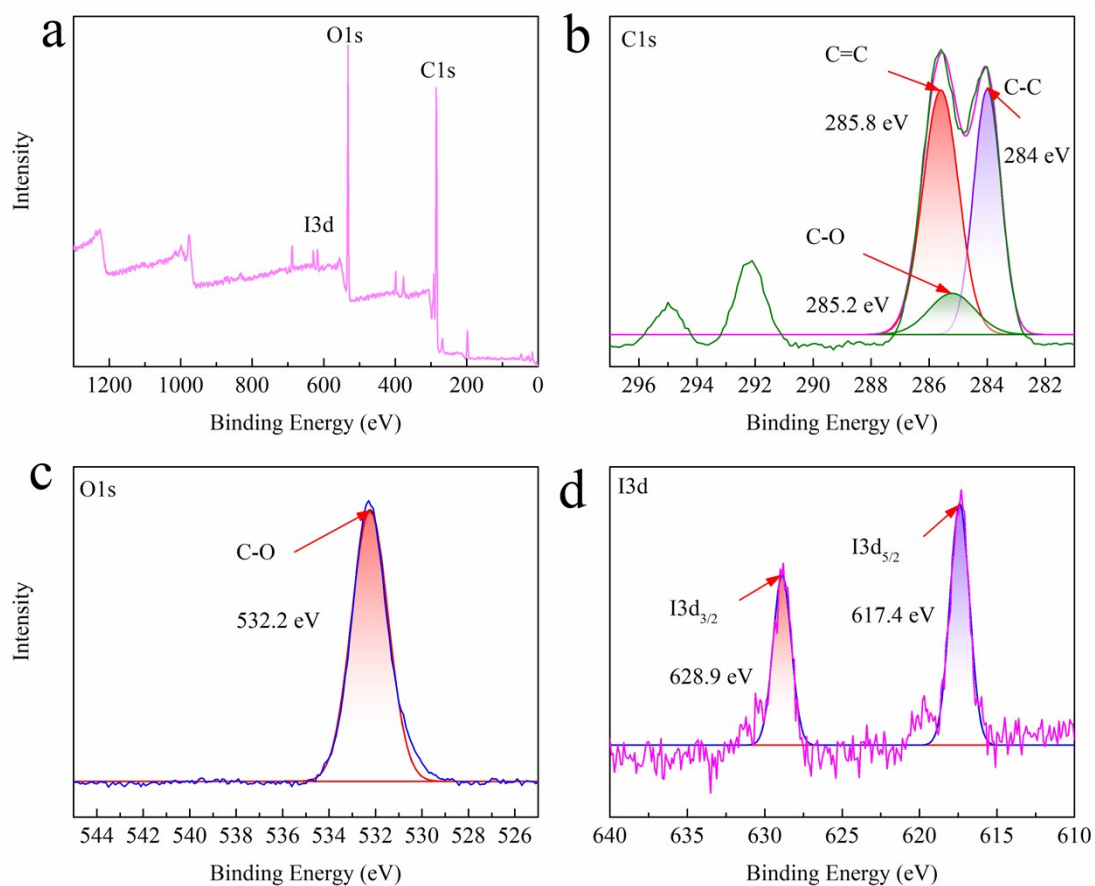

**Fig. S4** XPS spectra of recovered CHOP@KI-1, (a) full spectrum, (b) C1s, (c) O1s, (d) I3d.

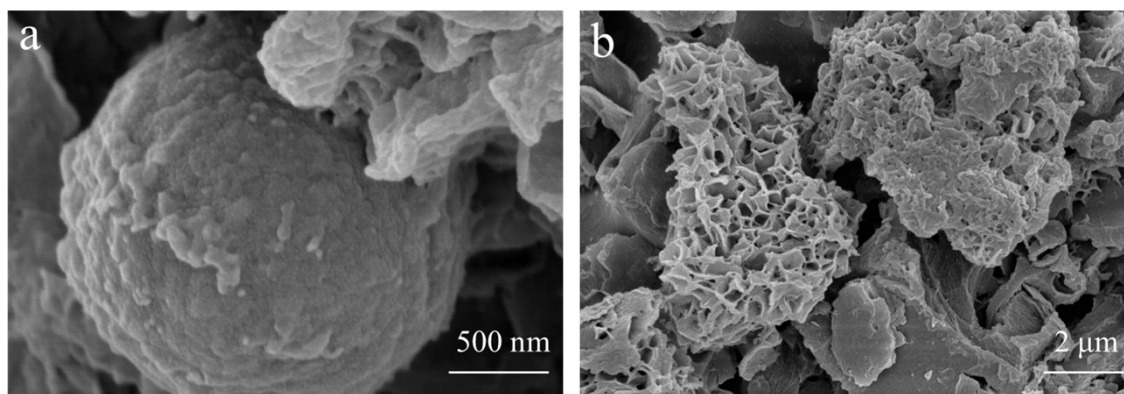

**Fig. S5** SEM images of recovered CHOP@KI-1

### Kinetic investigations

**Table S3** Effects of reaction time by CHOP@KI-1 at 50°C<sup>a</sup>

| Entry | Time (h) | Yield (%) <sup>b</sup> | 1-x   | ln(1-x)      |
|-------|----------|------------------------|-------|--------------|
| 1     | 11       | 16.20                  | 0.838 | -0.176737179 |
| 2     | 13.5     | 20.40                  | 0.796 | -0.228156093 |
| 3     | 16       | 24.70                  | 0.753 | -0.283690051 |
| 4     | 18.5     | 28.80                  | 0.712 | -0.339677368 |

5      21      33.20      0.668      -0.403467105

a: Reaction conditions: Catalyst: 40 mg, ECH: 10 mmol, solvent-free, 1 atm, T = 60°C; b: detected by <sup>1</sup>H-NMR

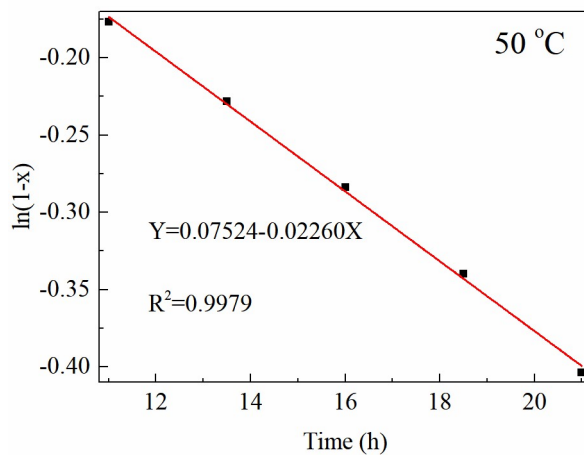

**Fig. S6** Ln(1 – x) versus time by **CHOP@KI-1** system at 50°C

**Table S4** Effects of reaction time by **CHOP@KI-1** at 60°C<sup>a</sup>

| Entry | Time (h) | Yield (%) <sup>b</sup> | 1-x   | ln(1-x)      |
|-------|----------|------------------------|-------|--------------|
| 1     | 8        | 16.00                  | 0.84  | -0.174353387 |
| 2     | 11       | 26.70                  | 0.733 | -0.310609577 |
| 3     | 14       | 34.40                  | 0.656 | -0.42159449  |
| 4     | 17       | 41.80                  | 0.582 | -0.541284831 |
| 5     | 20       | 48.70                  | 0.513 | -0.667479434 |

a: Reaction conditions: Catalyst: 40 mg, ECH: 10 mmol, solvent-free, 1 atm, T = 60°C;

b: detected by <sup>1</sup>H-NMR

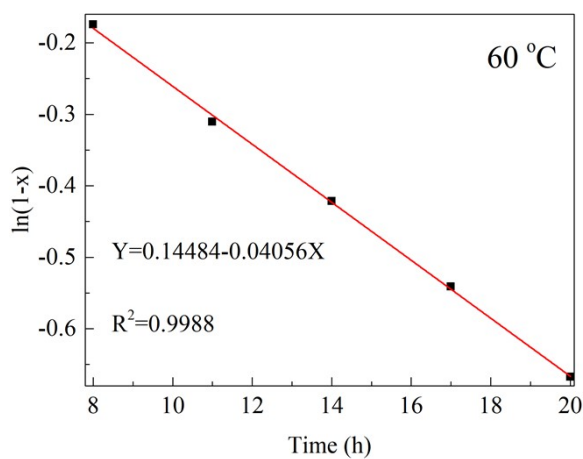

**Fig. S7**  $\ln(1 - x)$  versus time by **CHOP@KI-1** system at 60°C

**Table S5** Effects of reaction time by **CHOP@KI-1** at 70°C<sup>a</sup>

| Entry | Time (h) | Yield (%) <sup>b</sup> | 1-x   | $\ln(1-x)$   |
|-------|----------|------------------------|-------|--------------|
| 1     | 2.5      | 10                     | 0.9   | -0.105360516 |
| 2     | 5        | 26.30                  | 0.737 | -0.305167387 |
| 3     | 7.5      | 35.10                  | 0.649 | -0.432322562 |
| 4     | 10       | 49.00                  | 0.51  | -0.673344553 |
| 5     | 12.5     | 55.00                  | 0.45  | -0.798507696 |

a: Reaction conditions: Catalyst: 40 mg, ECH: 10 mmol, solvent-free, 1 atm, T = 70°C;

b: detected by <sup>1</sup>H-NMR

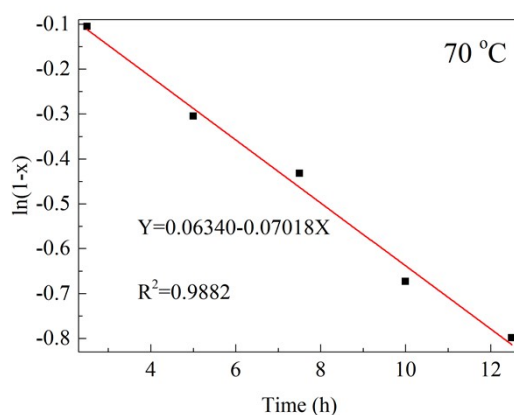

**Fig. S8**  $\ln(1 - x)$  versus time by **CHOP@KI-1** system at 70°C

**Table S6** Effects of reaction time by **CHOP@KI-1** at 80°C<sup>a</sup>

| Entry | Time (h) | Yield (%) <sup>b</sup> | 1-x   | $\ln(1-x)$   |
|-------|----------|------------------------|-------|--------------|
| 1     | 2.5      | 11                     | 0.888 | -0.118783536 |
| 2     | 5        | 32.60                  | 0.674 | -0.394525168 |
| 3     | 7.5      | 50                     | 0.497 | -0.699165253 |
| 4     | 10       | 68                     | 0.32  | -1.139434283 |
| 5     | 12.5     | 77.00                  | 0.23  | -1.46967597  |

a: Reaction conditions: Catalyst: 40 mg, ECH: 10 mmol, solvent-free, 1 atm, T = 80°C;

b: detected by <sup>1</sup>H-NMR

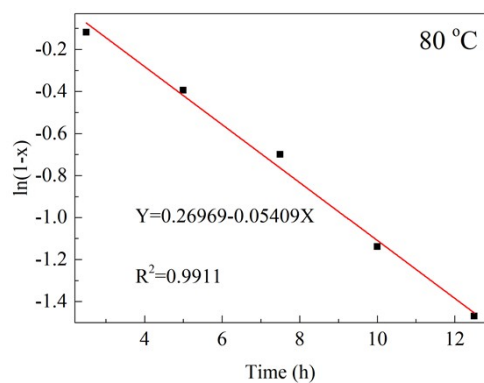

**Fig. S9** Ln(1 – x) versus time by **CHOP@KI-1** system at 80°C

**Table S7** Effects of reaction temperature on k by **CHOP@KI-1**

| Entry | k       | ln k         | T   | 1/T         |
|-------|---------|--------------|-----|-------------|
| 1     | 0.0226  | -3.789805373 | 323 | 0.003095975 |
| 2     | 0.04056 | -3.20497292  | 333 | 0.003003003 |
| 3     | 0.07018 | -2.656691909 | 343 | 0.002915452 |
| 4     | 0.13787 | -1.981444067 | 353 | 0.002832861 |

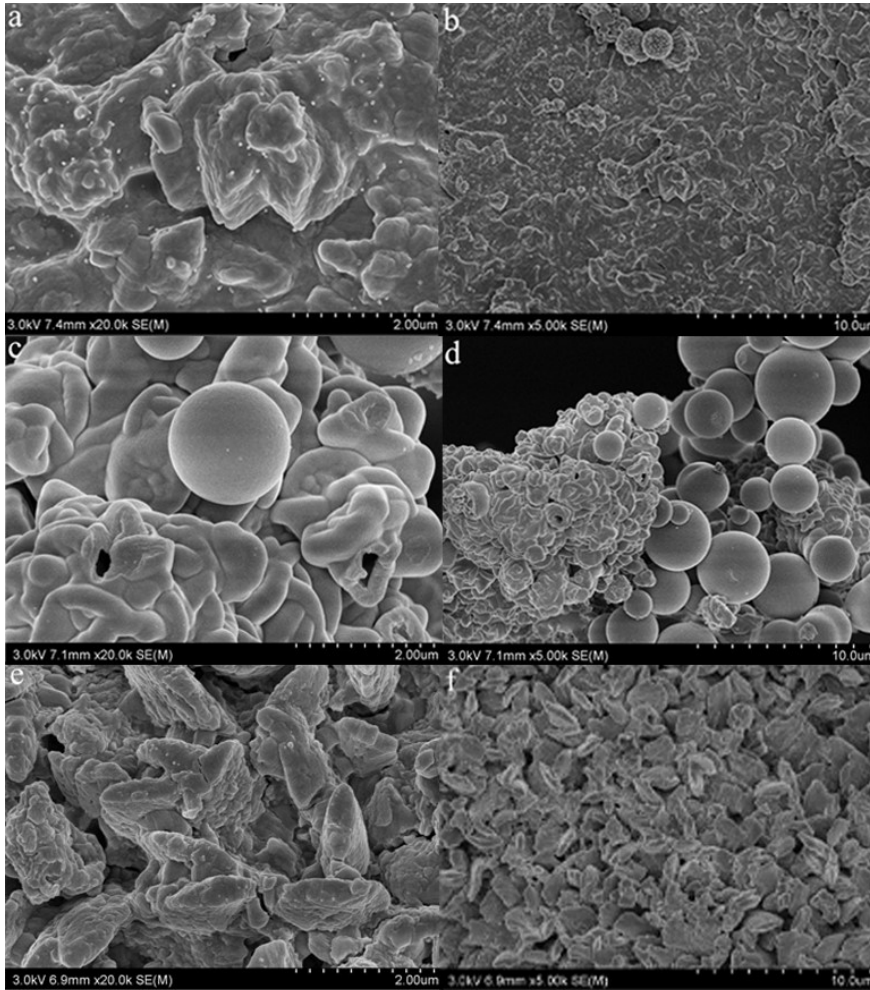

**Fig. S10** SEM image of saturated iodine adsorbed by CHOP@KIs

The pseudo-first-order, pseudo-second-order, Boyd's film diffusion and Webber's intraparticle diffusion kinetic models equation as follows:

$$\text{pseudo-first-order: } q_t = q_e(1 - e^{-k_1 t}) \quad (\text{S1})$$

$$\text{pseudo-second order: } q_t = \frac{q_e^2 k_2 t}{1 + q_e k_2 t} \quad (\text{S2})$$

$$\text{Boyd's film diffusion: } F = \frac{q_t}{q_e} \quad (\text{S3})$$

$$\text{For } F \text{ values} > 0.85, Bt = -0.4977 - \ln(1 - F) \quad (\text{S4})$$



For F values < 0.85,

$$Bt = \left( \sqrt{\pi} - \sqrt{\pi - \left( \frac{\pi^2 F}{3} \right)} \right)^2 \quad (\text{S5})$$

Webber's intraparticle diffusion:  $q_t = k_i \sqrt{t} + C \quad (\text{S6})$

Where  $q_t$  ( $\text{g g}^{-1}$ ) and  $q_e$  ( $\text{g g}^{-1}$ ) represent the amount of adsorption captured at time  $t$  and at equilibrium time.  $k_1$  ( $\text{h}^{-1}$ ),  $k_2$  ( $\text{g g}^{-1} \text{h}^{-1}$ ) and  $k_i$  ( $\text{g g}^{-1} \text{h}^{-1/2}$ ) are the rate constants for pseudo-first-order, pseudo-second-order and Webber's intraparticle diffusion models, respectively.  $F$  is the fraction of the equilibrium reached at time  $t$ , and  $Bt$  is a function of  $F$ .  $C$  is the intercept of the intraparticle diffusion model.

**Table S8.** Parameters of pseudo-first-order, pseudo-second-order, Boyd's film diffusion and Webber's intraparticle diffusion models for the adsorption of iodine onto CHOP@KIs.

| dynamical model                  | parameter                                                              | CHOP@KI-1 | CHOP@KI-2 | CHOP@KI-3 |
|----------------------------------|------------------------------------------------------------------------|-----------|-----------|-----------|
| pseudo-first-order               | $k_1(\text{h}^{-1})$                                                   | 0.07223   | 0.05303   | 0.0622    |
|                                  | $q_e(\text{g} \cdot \text{g}^{-1})$                                    | 1.52037   | 1.48114   | 1.68203   |
|                                  | $R^2$                                                                  | 0.99354   | 0.99444   | 0.9909    |
| pseudo-second-order              | $k_2(\times 10^{-2} \text{g} \cdot \text{g}^{-1} \cdot \text{h}^{-1})$ | 0.03502   | 0.02204   | 0.0246    |
|                                  | $q_e(\text{g} \cdot \text{g}^{-1})$                                    | 1.95011   | 2.01454   | 2.22728   |
|                                  | $R^2$                                                                  | 0.97877   | 0.98677   | 0.97689   |
| Boyd's film diffusion            | Intercept                                                              | -0.50511  | -0.61274  | -0.58573  |
|                                  | $R^2$                                                                  | 0.95338   | 0.8869    | 0.92823   |
| Webber's intraparticle diffusion | $k_{i1}(\text{g} \cdot \text{g}^{-1} \cdot \text{h}^{-1/2})$           | 0.33098   | 0.29133   | 0.36572   |
|                                  | Intercept                                                              | -0.28834  | -0.319    | -0.39951  |

|                                         |         |         |         |
|-----------------------------------------|---------|---------|---------|
| $R^2$                                   | 0.995   | 0.99734 | 0.99772 |
| $k_{i2}(g \cdot g^{-1} \cdot h^{-1/2})$ | 0.06434 | 0.1173  | 0.09224 |
| Intercept                               | 1.01179 | 0.56053 | 0.94391 |
| $R^2$                                   | 0.91017 | 0.98483 | 0.95254 |
| $k_{i3}(g \cdot g^{-1} \cdot h^{-1/2})$ | 0.01605 | 0.01573 | 0.01563 |
| Intercept                               | 1.35027 | 1.26227 | 1.47671 |
| $R^2$                                   | 1       | 1       | 1       |

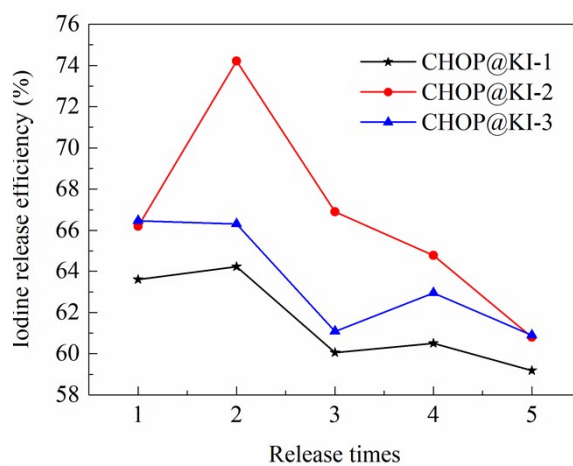

**Fig. S11** Iodine release efficiency of saturated samples

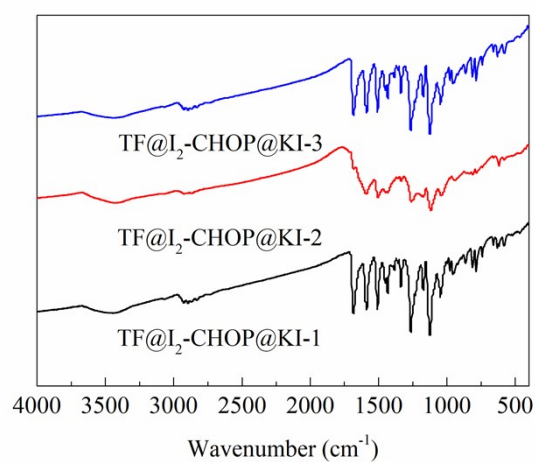

**Fig. S12** FT-IR spectra of recycled samples
